# Supplementary material
Source: PubMed Central journal article supplement (PMC3669181)
Supplement: auto-9-714-s01.pdf [file auto-9-714-s01.pdf]

## **Supplemental Material to:**

**Wen Yue, Ahmed Hamai, Giovanni Tonelli,  
Chantal Bauvy, Valérie Nicolas, Hugo Tharinger,  
Patrice Codogno and Maryam Mehrpour**

**Inhibition of the autophagic flux by salinomycin  
in breast cancer stem-like/progenitor cells interferes  
with their maintenance**

**Autophagy 2013; 9(5)**

**<http://dx.doi.org/10.4161/auto.23997>**

**[www.landesbioscience.com/journals/autophagy/article/23997](http://www.landesbioscience.com/journals/autophagy/article/23997)**

Figure S1

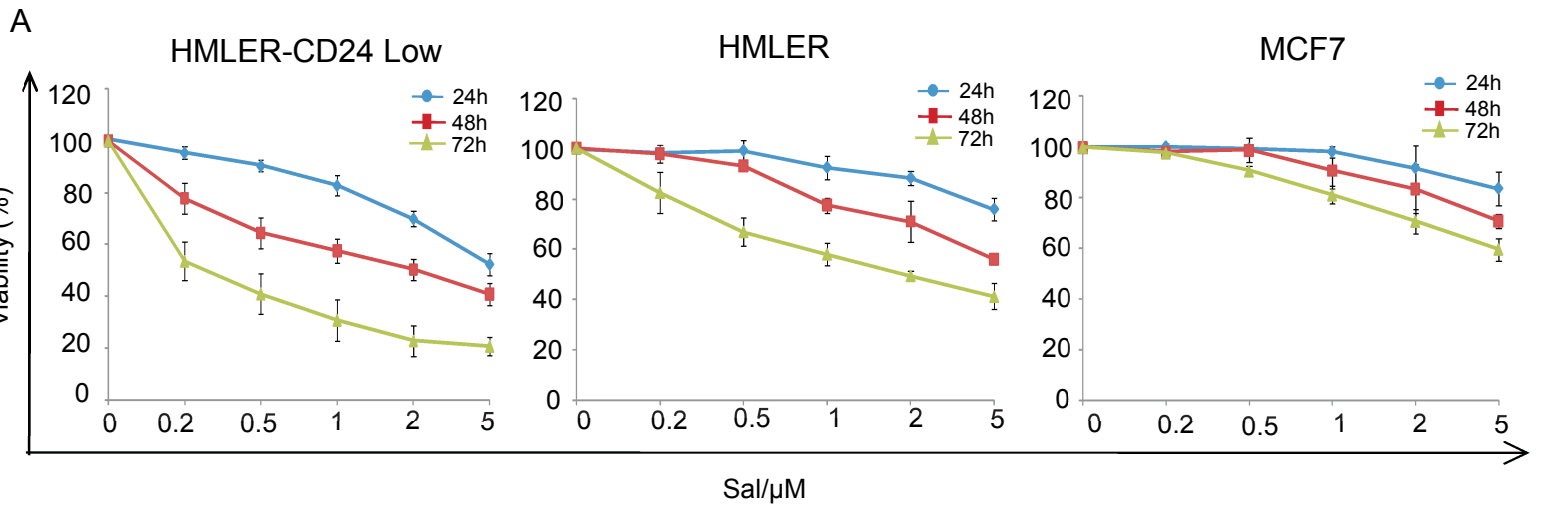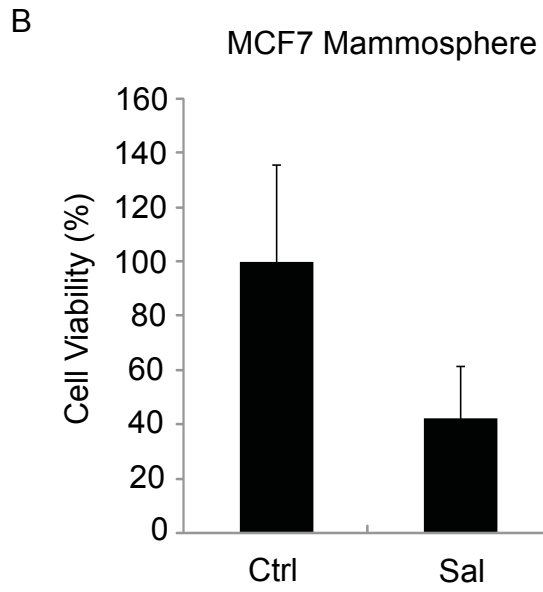

Figure S2

A

Cell sorting for ALDH activity of parental HMLER cell line

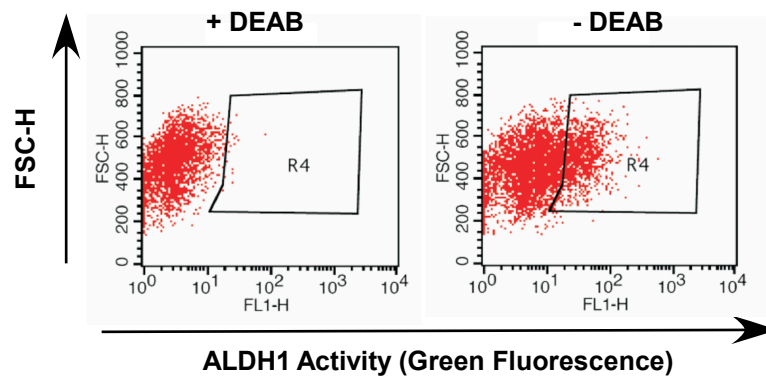

B

After cell sorting for ALDH activity and cell culture

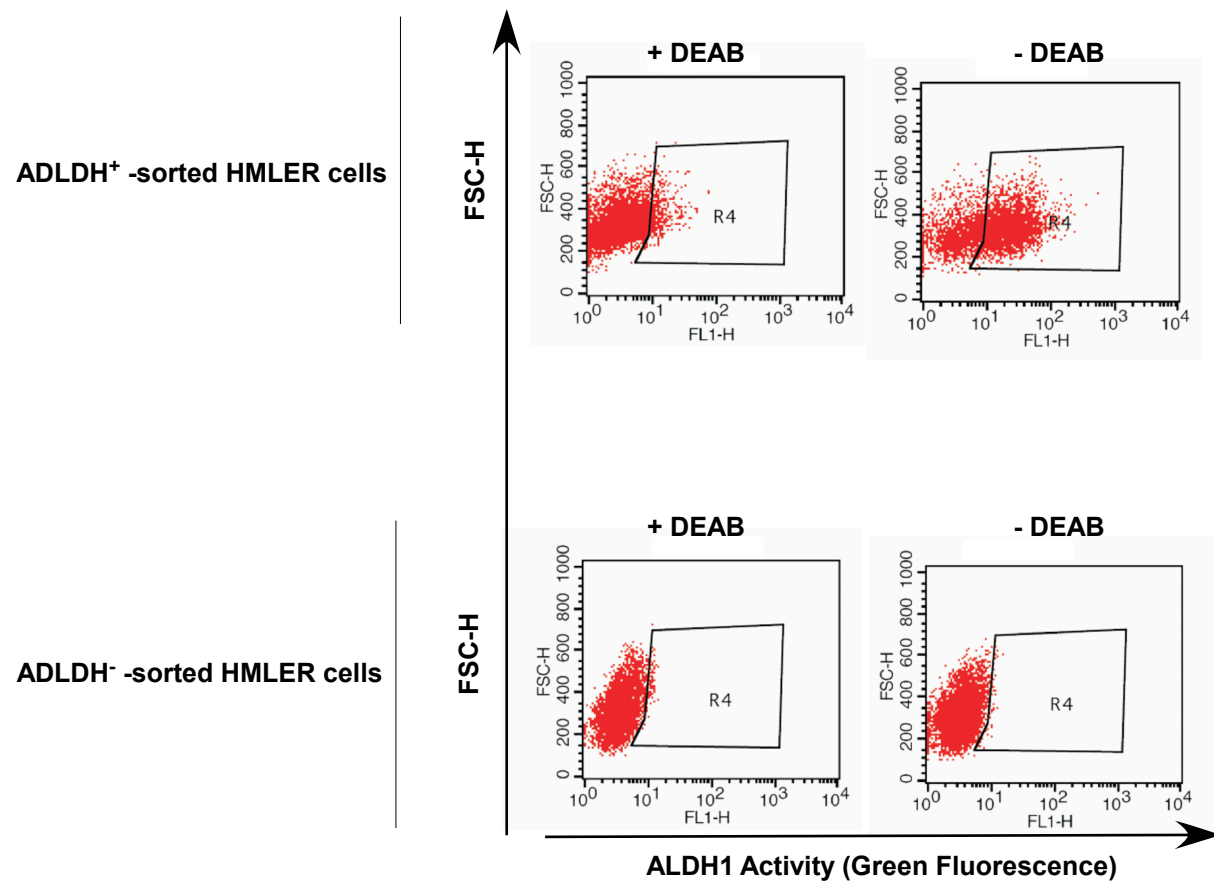

## **Supplemental data**

**Figure S1.** (A) HMLER, HMLER-CD24<sup>Low/-</sup> and MCF7 cell lines treated with the indicated concentrations of Sal for the times described, and cell viability was measured by MTS.

(B) The single-cell suspension from primary mammospheres of MCF7 cells were seeded at a single cell/well in a 96-well plate, and mammospheres formed after 7 days.

Mammospheres were treated with 2  $\mu$ M of Sal for 4 days before measuring the cell viability.

**Figure S2.** Analysis of ALDH1 activity in the parental HMLER cells (A) and ALDH<sup>-</sup> and ALDH<sup>+</sup> HMLER cells (B) isolated from HMLER cells by fluorescence-activated cell sorting. ALDH1-activity in HMLER cells was measured by flow cytometry using the ALDEFLUOR reagent in the presence or absence of the ALDH1 inhibitor, DEAB. Cells expressing or not expressing ALDH1 were sorted using the ALDH<sup>+</sup> gate based on cells treated with the ALDH1-inhibitor DEAB. Cells were collected and cultured before being analyzed, as indicated in the legend of Figure 6.
